# Supplementary material
Source: Elsevier journal article supplement (https://www.sciencedirect.com/science/article/pii/S1413355517304744)
Supplement: mmc1 [file S1413355517304744:mmc1.docx]

***SUPPLEMENTARY MATERIAL***

***BJPT_2017_326_R1***

***PROTOCOLS (****Exercise_description_illustration****)***

***TREATMENT PROTOCOL PERFORMED BY THE SUBJECTS***

APPENDIX A

**QUADRICEPS GROUP**

1.Bike – 15 minutewarmup


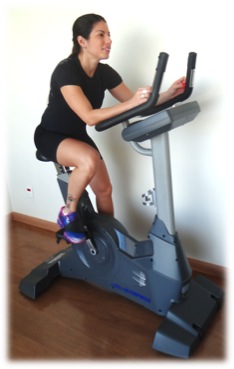


2.Straight Leg Raise – 3 sets of 10 repetitions with ankle weights resistence*.

**
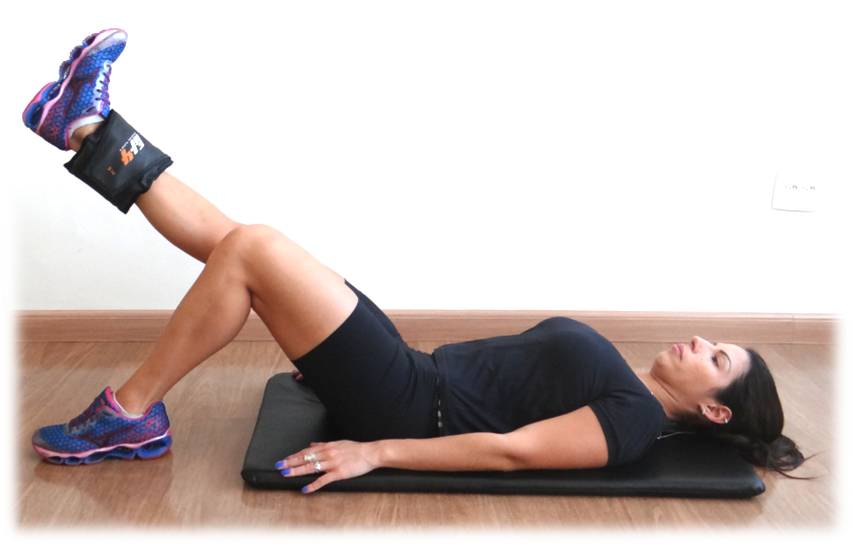
**

*Resistance = the weights were increased based on the patient’s reportson the Rating of Perceived Exertion (RPE) scale based on Borg's Scale of Effort.

3.Seated knee extension (open kinetic chain exercise, 90º – 60º of knee flexion) - 3 sets of 10 repetitions with resistence*.

**
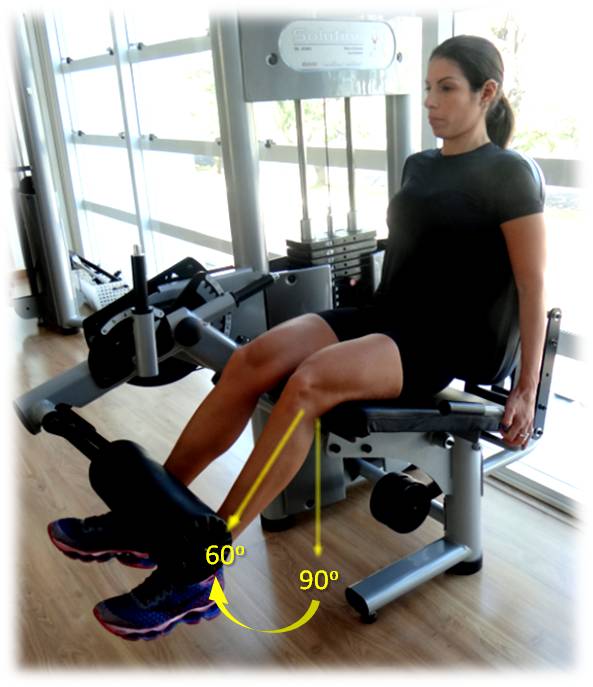
**

4.Leg Press (closed kinetic chain exercise, 0º – 45º of knee flexion) - 3 sets of 10 repetitions with resistence*.

**
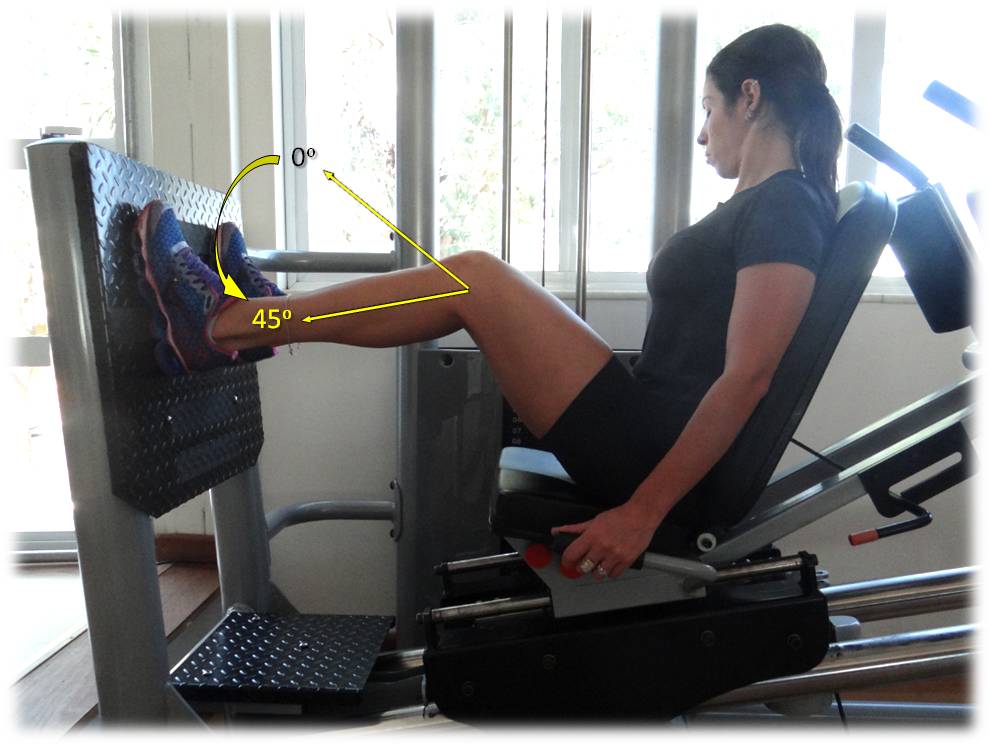
**

5.Wall Slide Squat at 90°- 3 setsof 1 minute

**
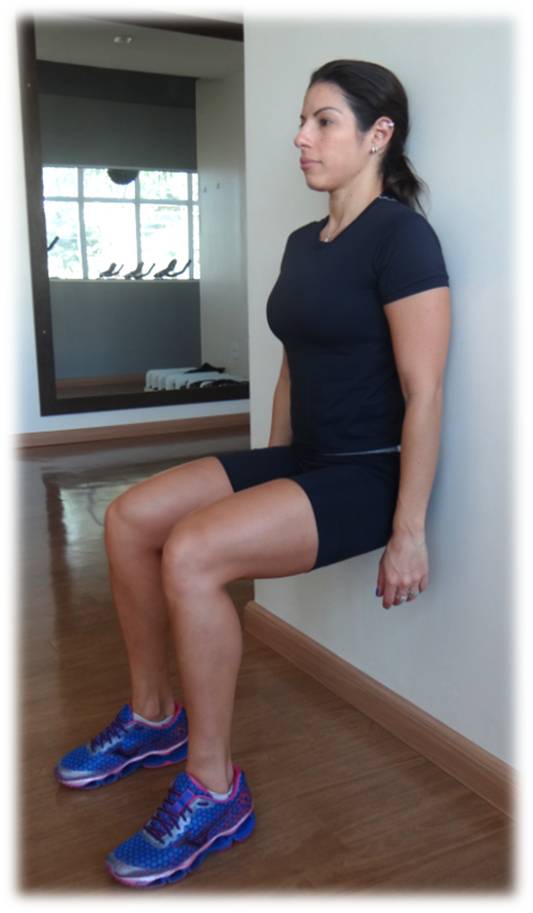
**

APPENDIX B

**HIP GROUP**

1.Bike – 15 minutes warmup


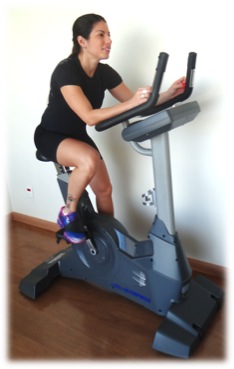


2.Straight Leg Raise in side lying– 3 sets of 10 repetitions using ankle weights asresistance*.

**
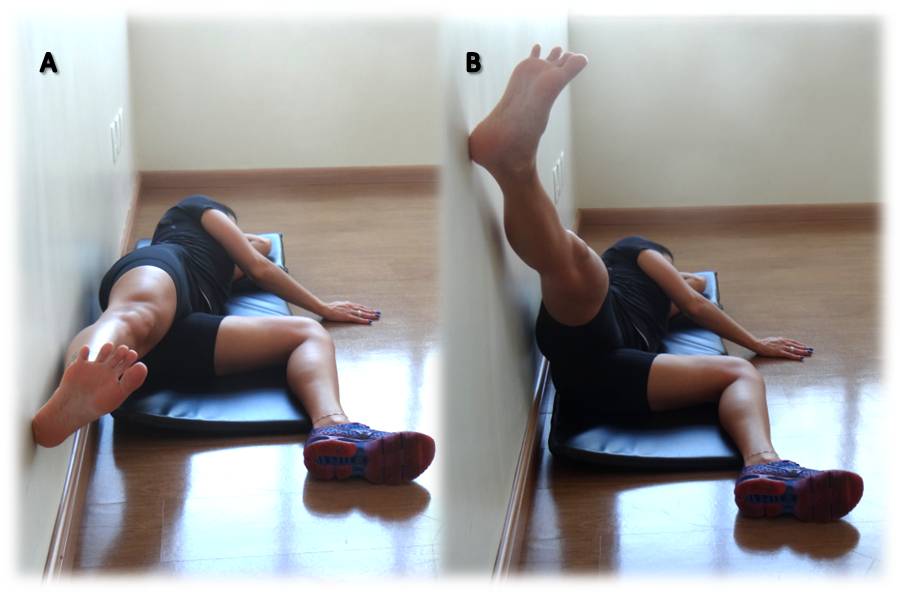
**

PS.: Exercise performed with slight extension and external rotation of the hip to emphasize posterior fibers of gluteus medius.

*Resistance = the weights were increased based on the patient’s reportson the Rating of Perceived Exertion (RPE) scale based on Borg's Scale of Effort.

3.Supine Bridge on Ball (A-1 start position, A-2 final position) and Lateral bridge (B-1 start position, B-2 final position) - 3 sets of 10 repetitions with 10 second isometric hold on the last repetition

**
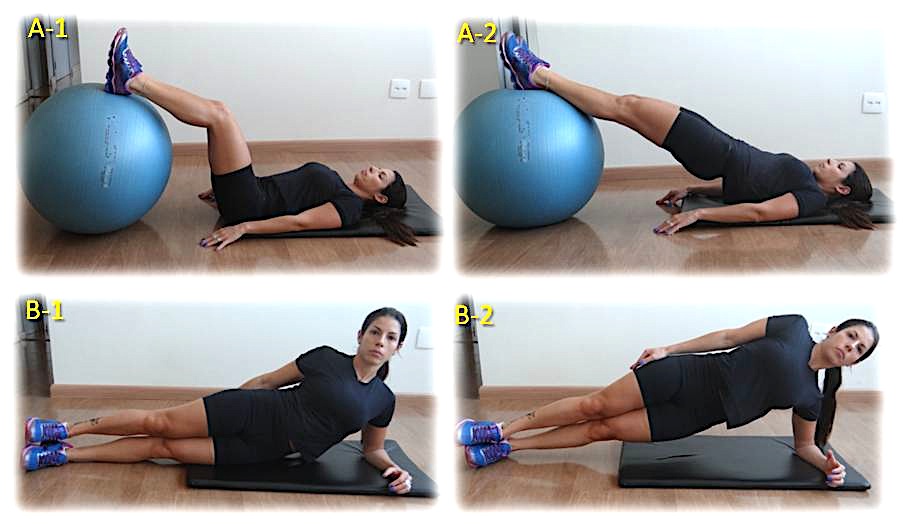
**

4.Seated Hip Abduction - 3 sets of 10 repetitions with resistance*.

**
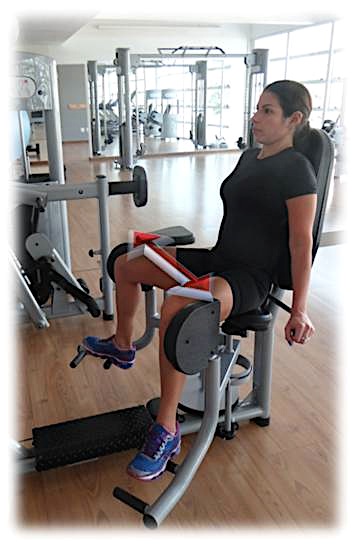
**

5.Strengthening the extensors, abductors and hip external rotators at four support positions (A – start position, B – intermediary position, C – final position) - 3 sets of 10 repetitions with ankle weights resistance*.

**
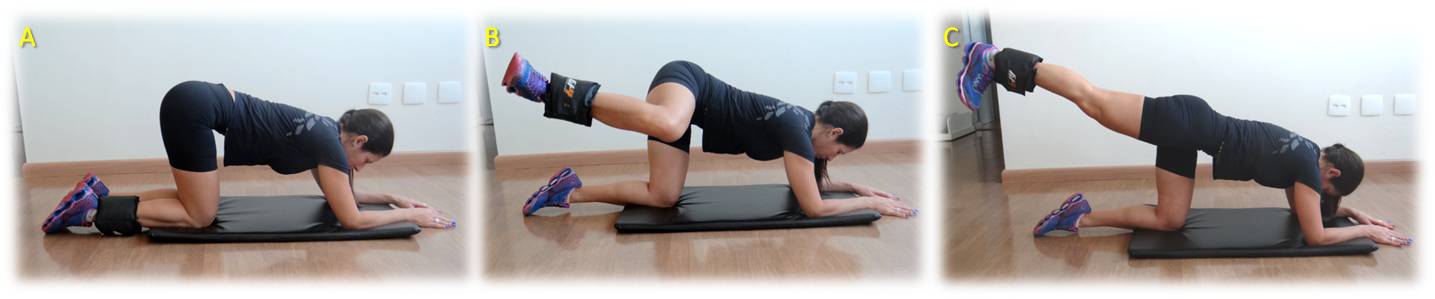
**

APPENDIX C

**STRETCHING GROUP**

1.Quadriceps stretching (A – standing position, B – variation in lying position) - 3 - 30 second stretches

**
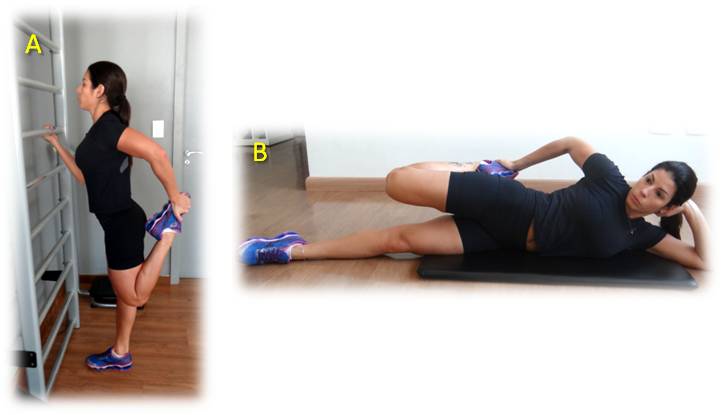
**

2.Hamstrings stretching (A – supine position, B – variation in seated position) - 3 -30 second stretches

**
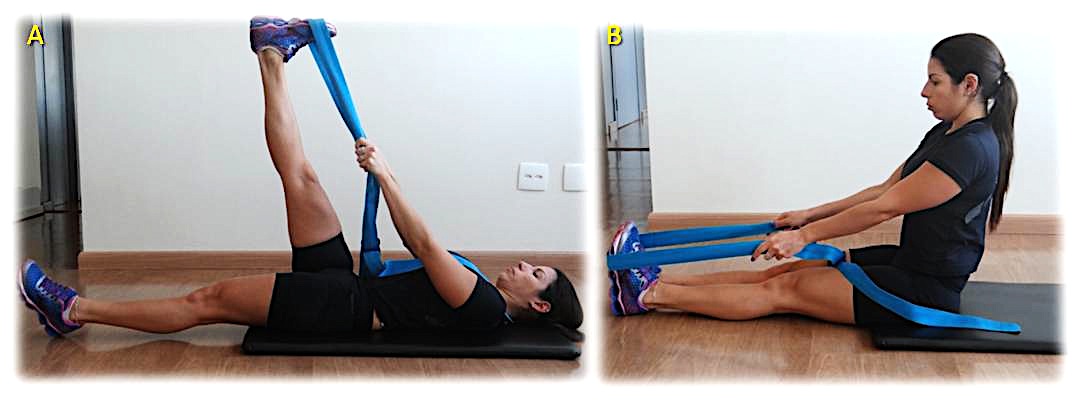
**

3.Gastrocnemius and soleus stretching (A – with assistance of ramp, B – standing position) - 3 - 30 second stretches

**
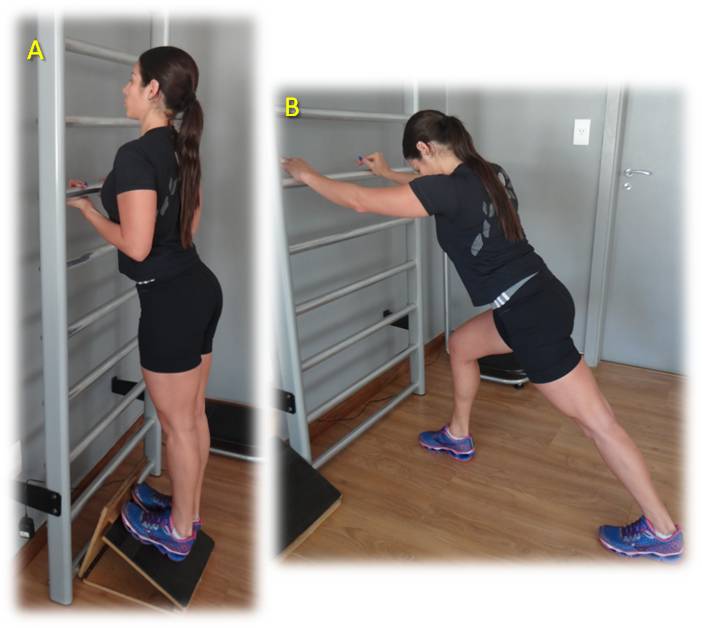
**

4.External rotators of hip and iliotibial band stretching (A – start position, B – intermediary position, C – final position) - 3 - 30 second stretches


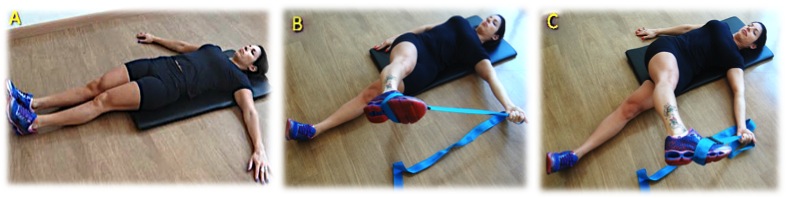


5.Flexors of hip stretching (A – on the floor, B – with assistance of the therapist) - 3 -30 second stretches

**
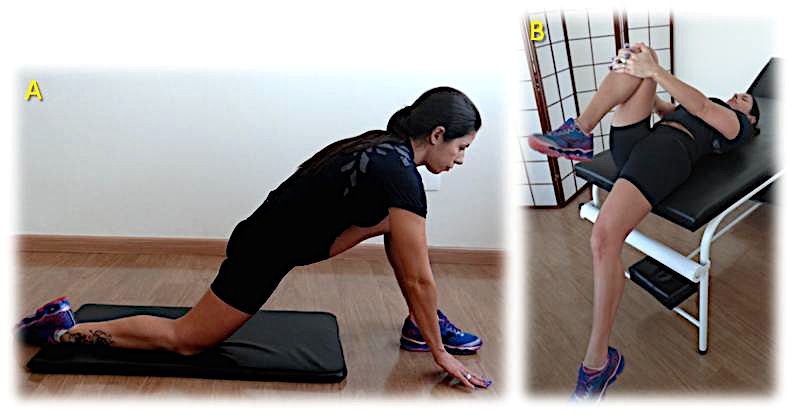
**

6.Aductors stretching - 3 - 30 second stretches

**
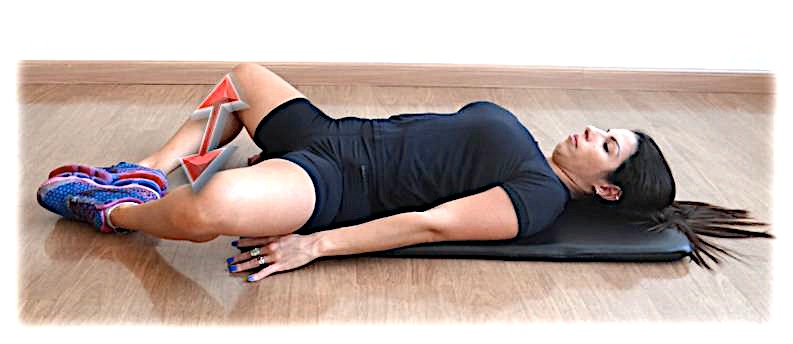
**

7.Abdominal stretching - 3 -30 second stretches

**
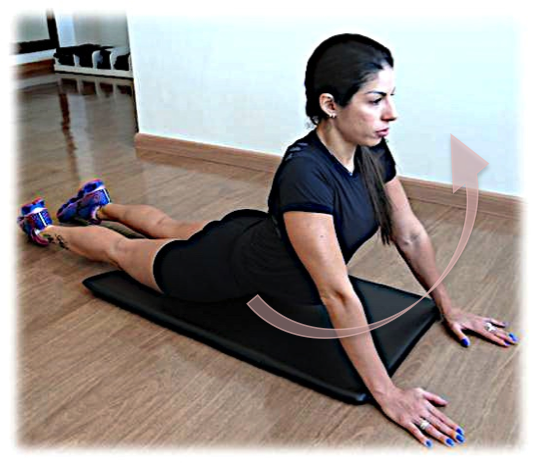
**
